# Supplementary material for: Self-triggered conformations of disulfide ensembles in coordination polymers with multiple metal clusters
Source: Royal Society of Chemistry journal article supplement (doi:10.1039/c4ce02421d), 2015-01-01
Supplement: c4ce02421d1.pdf [file c4ce02421d1.pdf]

## SUPPLEMENTARY INFORMATION

### Self-triggered conformations of disulfide ensembles in coordination polymers with multiple metal clusters

Tien-Wen Tseng,<sup>\*a</sup> Tzuoo-Tsair Luo,<sup>b</sup> Ying-Ru Shih,<sup>ab</sup> Jing-Wen Shen,<sup>ab</sup> Li-Wei Lee,<sup>b</sup> Ming-Hsi Chiang,<sup>\*b</sup> and Kuang-Lieh Lu<sup>\*b</sup>

<sup>a</sup>Department of Chemical Engineering, National Taipei University of Technology, Taipei 106, Taiwan

<sup>b</sup>Institute of Chemistry, Academia Sinica, Taipei 115, Taiwan

#### Contents

|                                                                                                                 |               |
|-----------------------------------------------------------------------------------------------------------------|---------------|
| Figures of Compounds <b>1–5</b>                                                                                 | Figs. S1–S30  |
| Thermogravimetric Analysis (TGA) Curves for Compounds <b>1–5</b>                                                | Figs. S31–S35 |
| Simulated and As-Synthesized PXRD Patterns for Compounds <b>1–5</b>                                             | Figs. S36–S40 |
| Plot of $\chi_M^{-1}$ vs. $T$ for Compound <b>2</b>                                                             | Fig. S41      |
| Plots of $\chi_M T$ vs. $T$ and $\chi_M^{-1}$ vs. $T$ for the Powder Samples of Compounds <b>3</b> and <b>5</b> | Figs. S42–S44 |
| IR Spectra of Compounds <b>1–5</b>                                                                              | Figs. S45–S49 |
| Photoluminescence spectra of Complexes <b>1–5</b> and H <sub>2</sub> L (H <sub>2</sub> dtdn)                    | Fig. S50      |

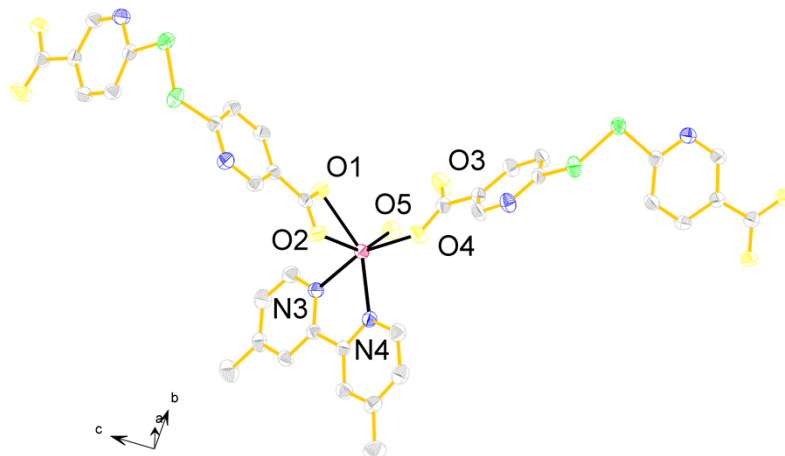

**Fig. S1** The ORTEP drawing of **1** with 50% thermal ellipsoid probability. Hydrogen atoms were omitted for clarity.

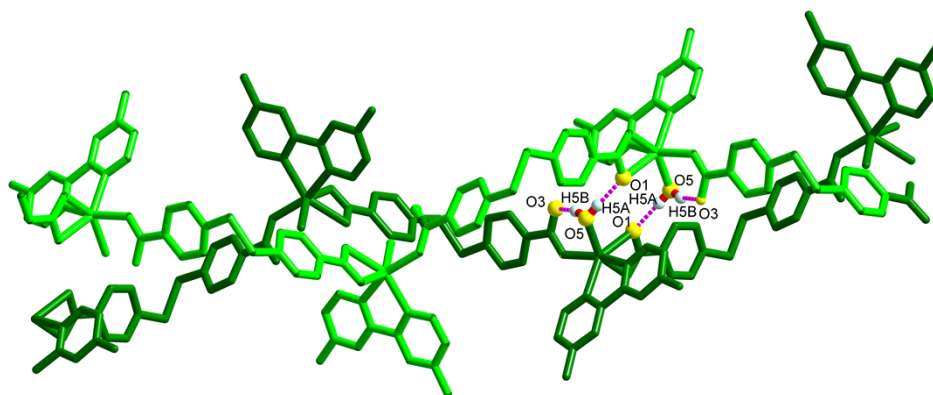

**Fig. S2** Two 1D zigzag chains of **1** are paired together via the hydrogen bonding interactions.

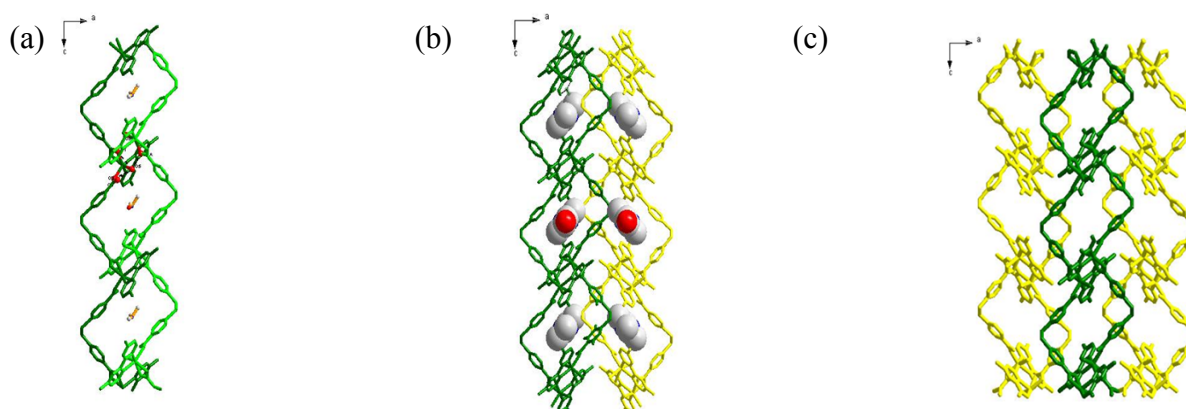

**Fig. S3** Structures of **1**: (a) two chains are paired to form a 1D double-stranded ladder viewed along the *a* axis; (b) each cavity is filled with a DMF molecule in space-filling mode viewed along the *b* axis; (c) a 2D framework is stacked with the ladders in an ABAB fashion.

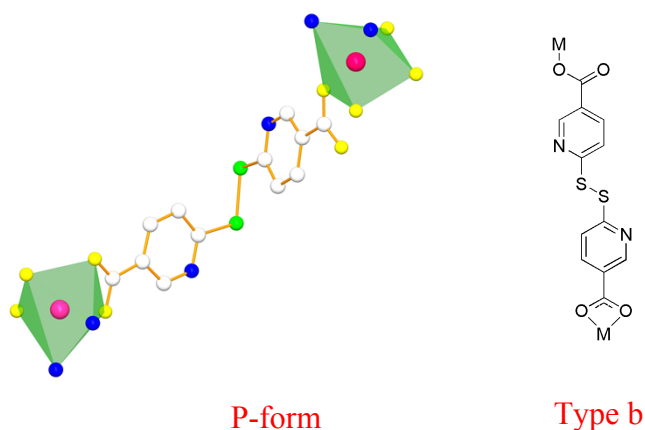

**Fig. S4** The coordination mode of the  $\text{dtdn}^{2-}$  ligand of **1** displays P-form and Type b.

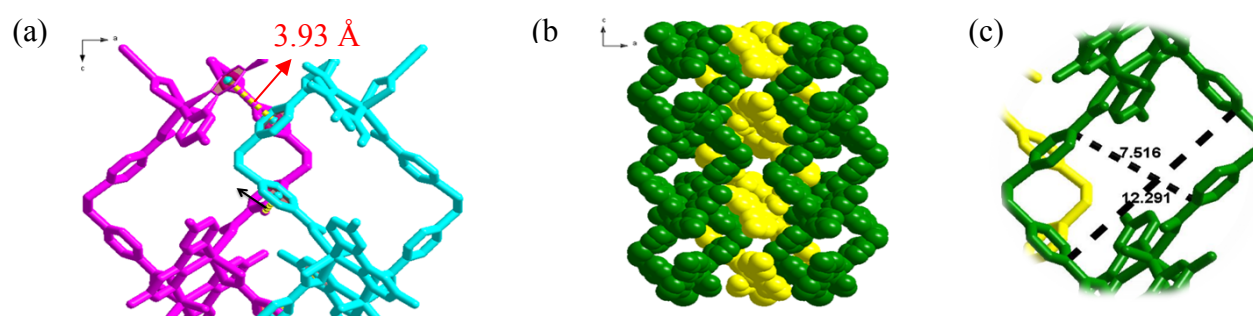

**Fig. S5** The structures of compound **1**: (a) showing the  $\pi$ - $\pi$  stacking interactions with 3.84 Å and 3.93 Å, (b) showing a 2D sheet with the cavities in a space-filling mode, (c) the window size of cavity with  $7.52 \times 12.29 \text{ Å}^2$  and its guest DMF molecule was omitted for clarity.

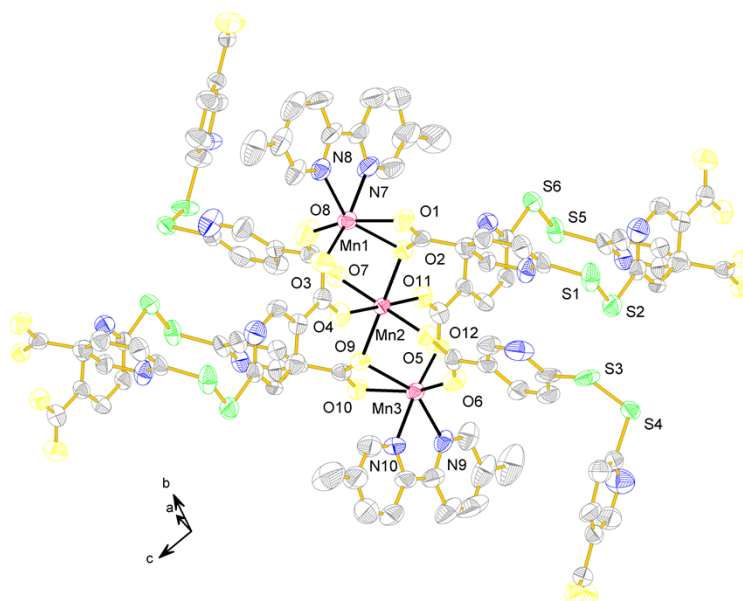

**Fig. S6** The ORTEP drawing of **2** with 30% thermal ellipsoid probability. Hydrogen atoms were omitted for clarity.

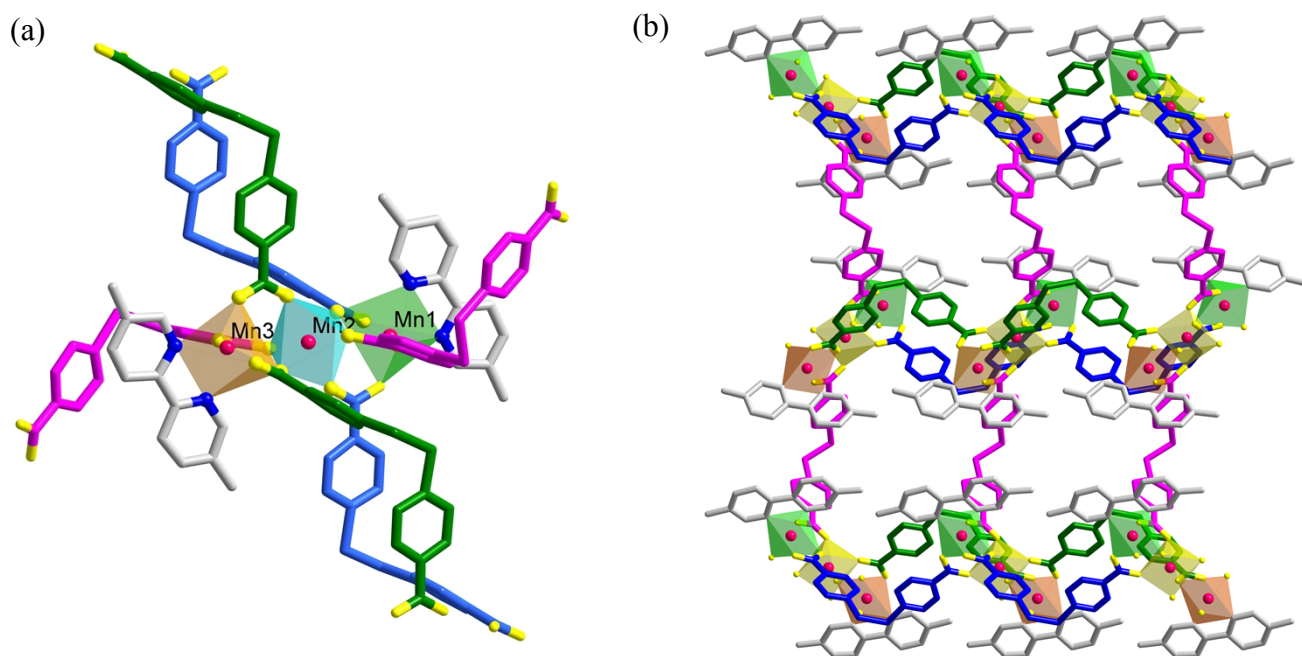

**Fig. S7** (a) View of six  $\text{dtdn}^{2-}$  ligands on a trinuclear cluster of **2** with the separation distances of  $\text{Mn1}\cdots\text{Mn2}$  and  $\text{Mn2}\cdots\text{Mn3}$  are 3.55 and 3.57 Å, respectively. (b) Schematic view of a 2D reticular framework along the  $c$  axis.

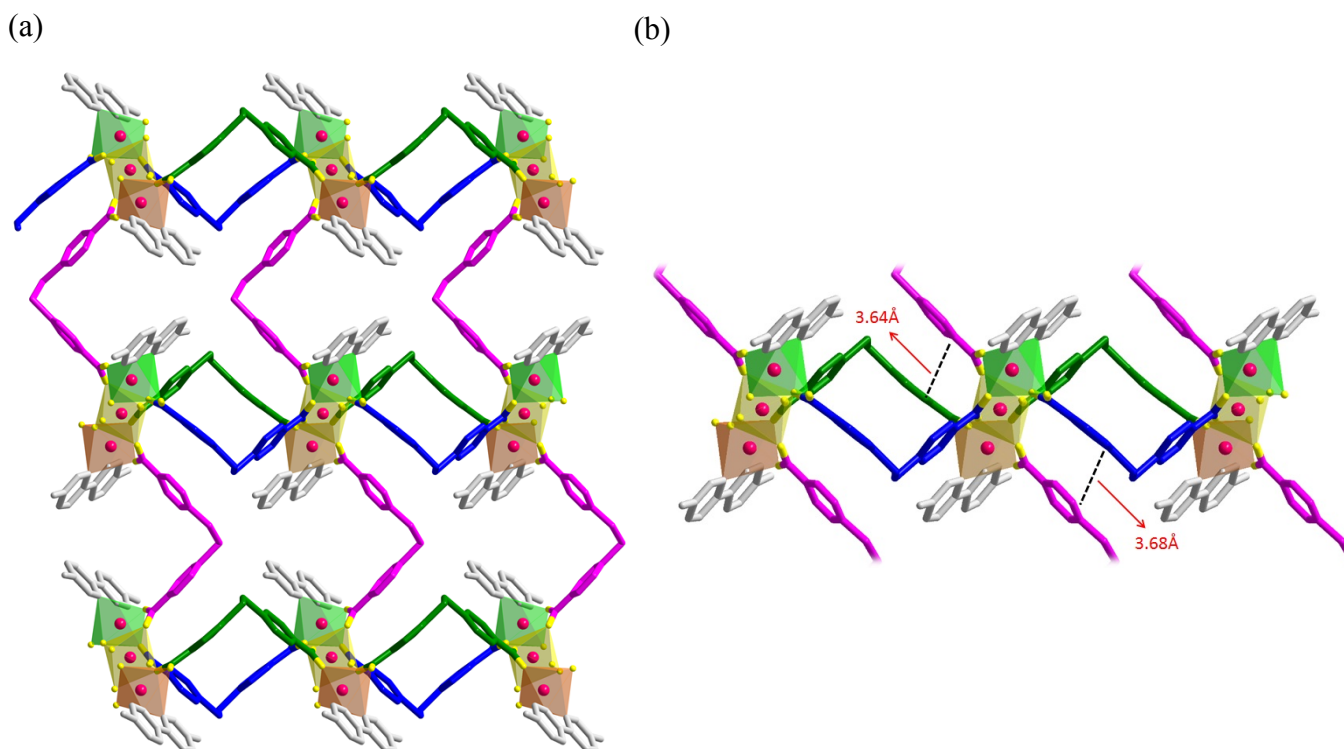

**Fig. S8** The structure of **2**: (a) schematic view of a planar structure, (b) a view of  $\pi$ - $\pi$  stacking interactions.

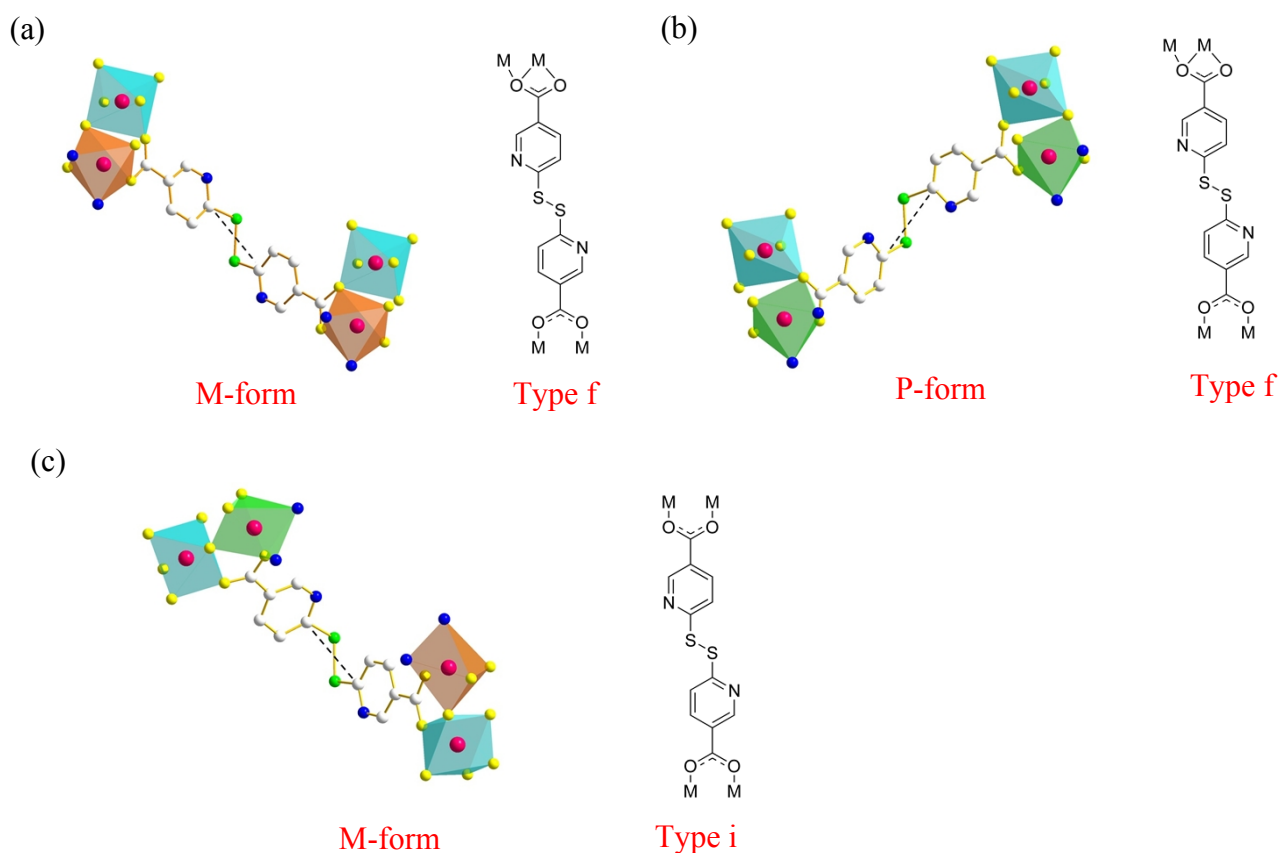

**Fig. S9** The structures of **2** show the axial chirality forms, coordination modes, and torsion angles ( $-\text{C}-\text{S}-\text{S}-\text{C}-$ ) of the  $\text{dtdn}^{2-}$  ligands: (a) M-form, Type (j), 104.2° and 106.1°; (b) P-form, Type (f), 105.4° and 106.3°; (c) M-form, Type (i), 106.6° and 103.1°.

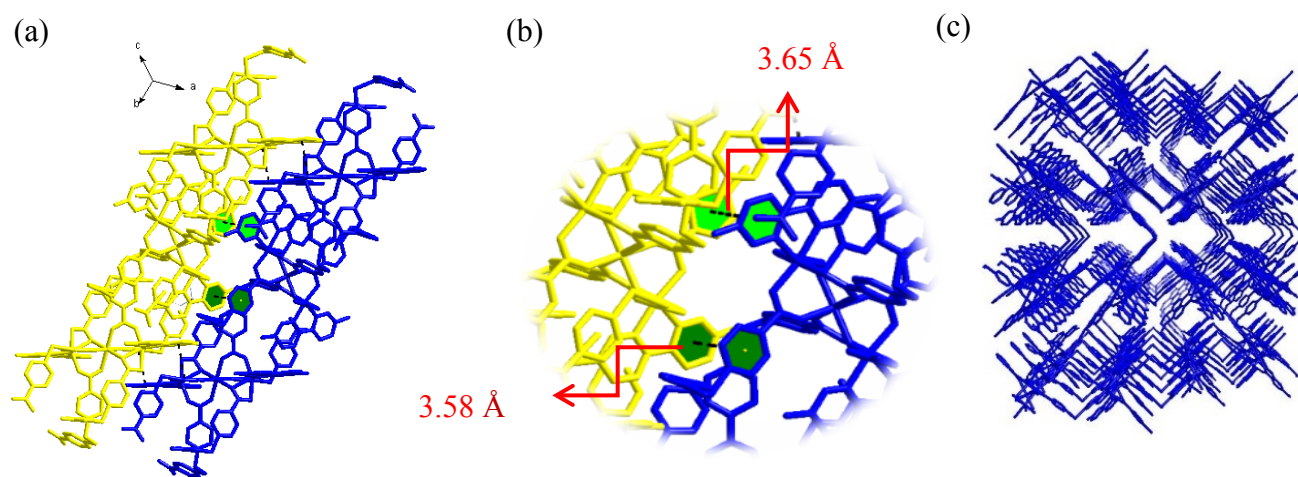

**Fig. S10** The structures of **2**: (a) showing the 2D layers are regularly packed into a 3D framework; (b) the  $\pi-\pi$  stacking interactions are present between two adjacent pyridyl rings of the  $\text{dtdn}^{2-}$  ligands; (c) a 3D packing diagram.

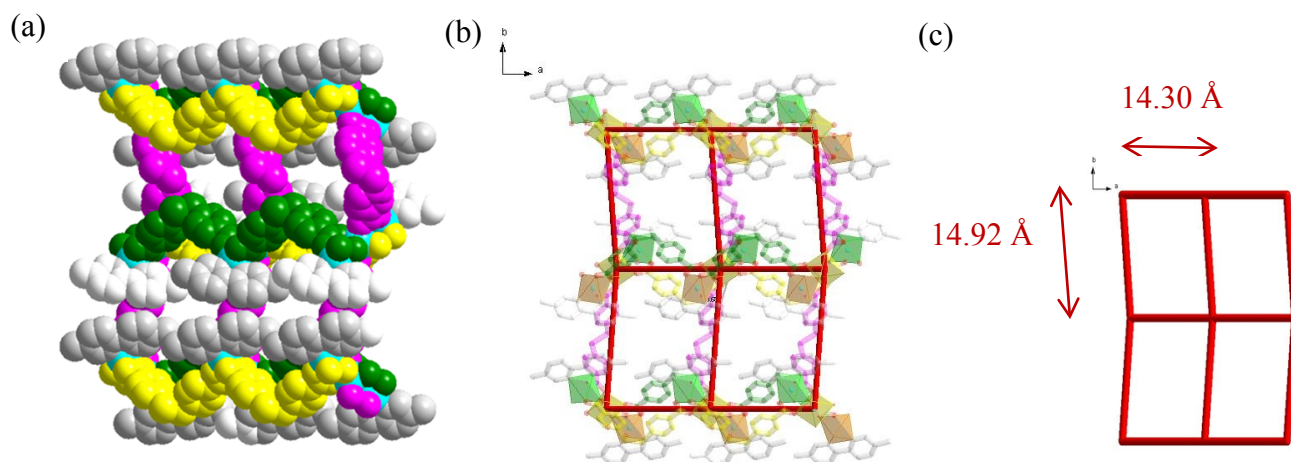

**Fig. S11** The structural views of **2**: (a) showing the pore cavities in space-filling mode excluded with the van der Waals radii and the hydrogen atoms and solvent molecules are omitted for clarity; (b) schematic representation of a 2D network with a  $4^4$ -**sql** topology; (c) showing the separation distances between the trinuclear clusters with  $14.30 \times 14.92 \text{ \AA}^2$ .



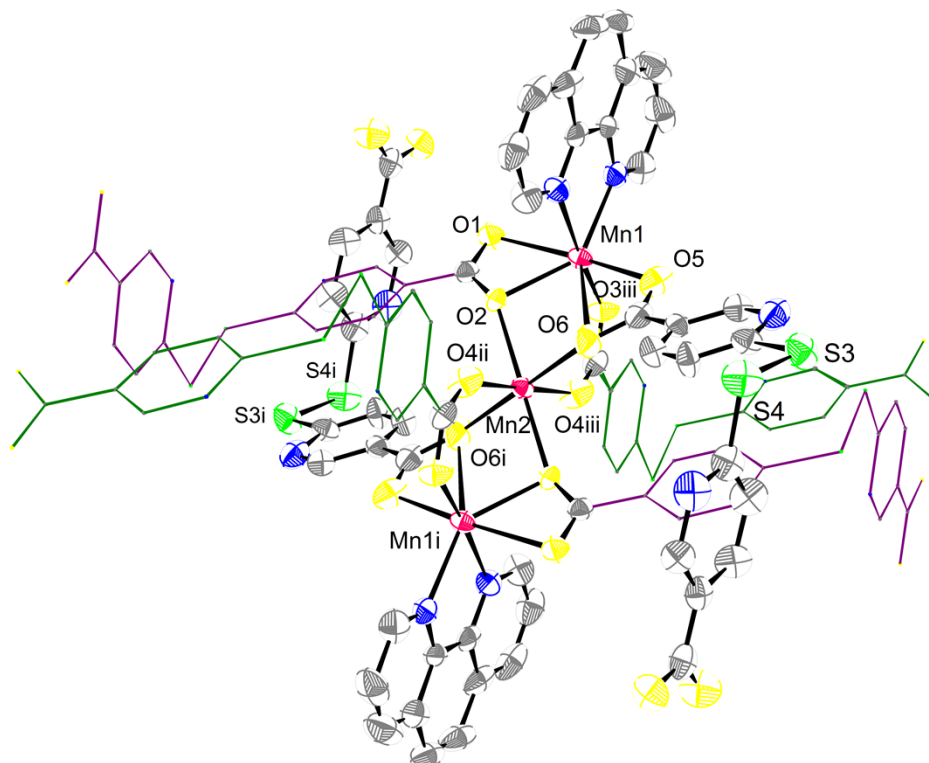

**Fig. S12** The ORTEP drawing of **3** with 30% thermal ellipsoid probability. Hydrogen atoms were omitted for clarity (symmetry transformations used to generate equivalent atoms: i =  $2 - x, -y, -z$ ; ii =  $1 - x, 1 - y, -z$ ; iii =  $1 + x, -1 + y, z$ ).

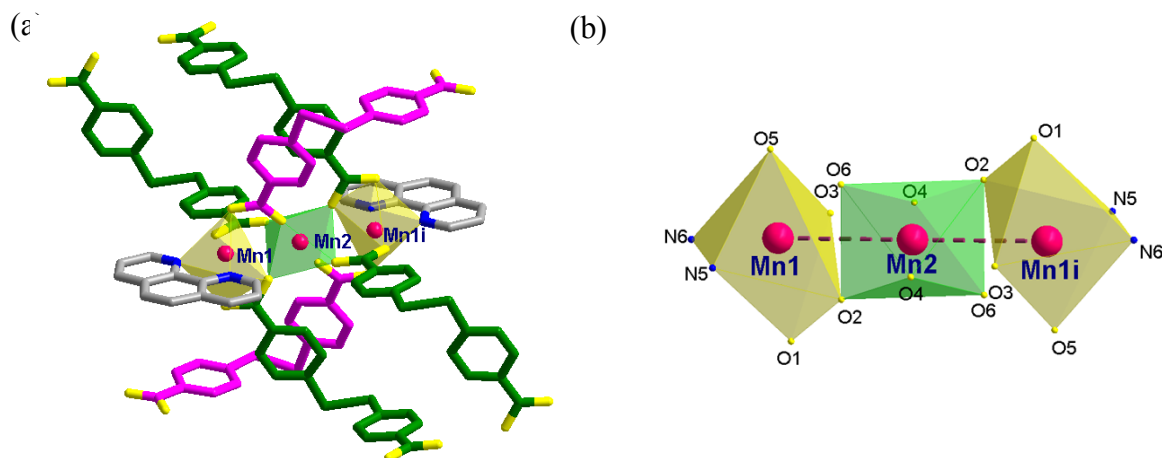

**Fig. S13** Structures of **3** (symmetry transformations used to generate equivalent atoms: i =  $2 - x, -y -z$ ): (a) a schematic representation, (b) a view of trinuclear cluster in a polyhedral mode, where the Mn(II) atoms are linked by carboxylato-oxygen atoms (O2) and the separation distance of Mn1...Mn2 with 3.42 Å.

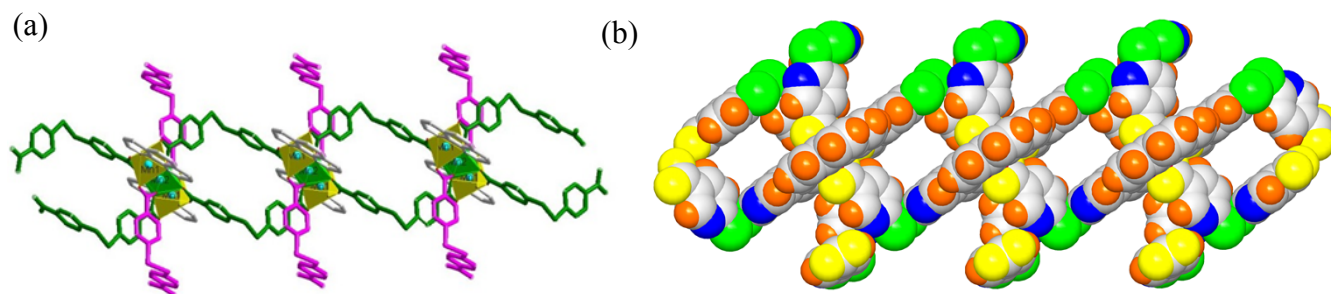

**Fig. S14** A 1D double-stranded rod dangling the Hddn<sup>-</sup> ligands (highlighted in pink) viewed along the *c* axis (a) with a polyhedron mode, (b) with a space-filling mode (green, S; blue, N; yellow, O; grey, C; orange, H).

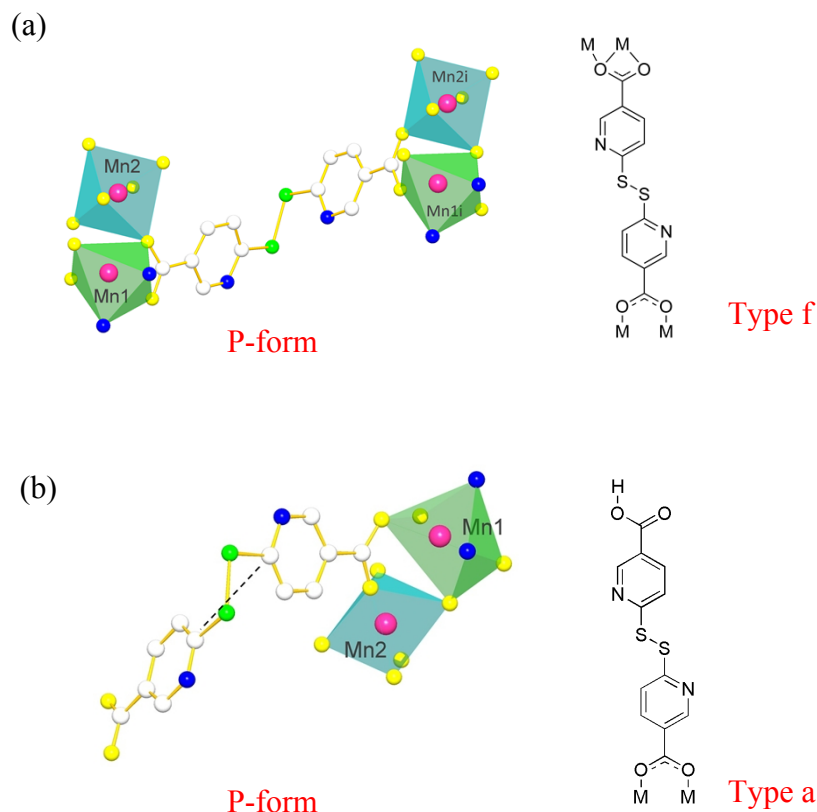

**Fig. S15** The structures of **3** show the axial chirality forms, coordination modes, and torsion angles ( $-\text{C}-\text{S}-\text{S}-\text{C}-$ ) of the  $\text{dt dn}^{2-}$  ligands: (a) P-form, Type (f),  $104.8^\circ$  and  $104.7^\circ$  (symmetry transformations used to generate equivalent atoms:  $i = -1 + x, 1 + y, z$ ); (b) P-form, Type (a),  $105.4^\circ$  and  $103.2^\circ$ .



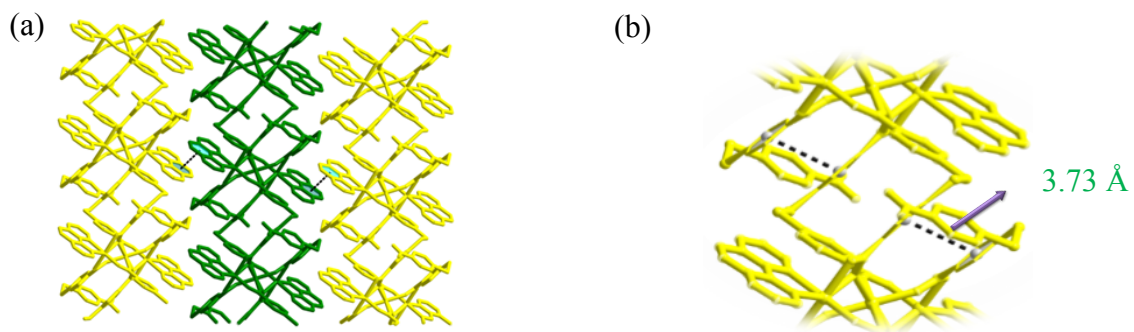

**Fig. S16** The structures of **3** with the  $\pi$ - $\pi$  stacking interactions: (a) a view of the 1D rods that are regularly stacked in an AAA manner viewed along the  $a$  axis; (b) connected via the adjacent pyridyl rings with 3.73(1) Å.

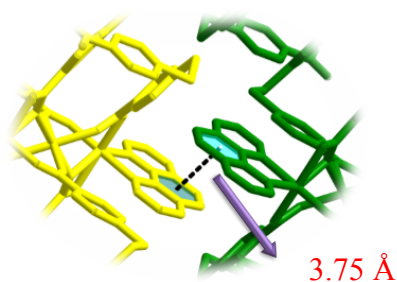

**Fig. S17** The structures of **3** with the  $\pi$ - $\pi$  stacking interactions connected via the phen rings with 3.75(1) Å.

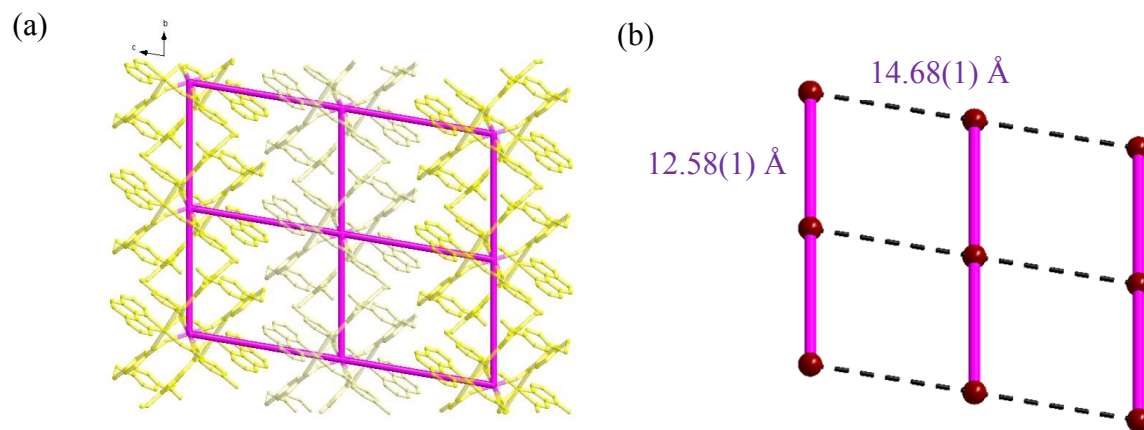

**Fig. S18** (a) Showing the environments of the trinuclear cluster units of **3** with a grid-like structure. (b) A schematic view of the trinuclear cluster with the separation distances of 14.68(1) x 12.58(1) Å<sup>2</sup>.

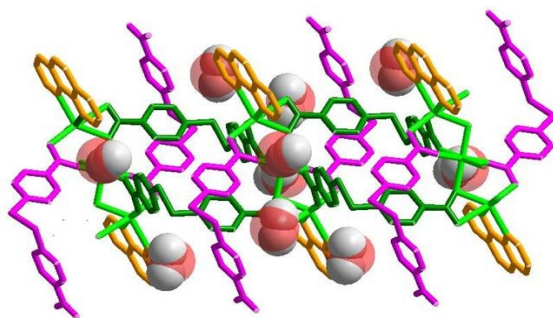

**Fig. S19** Showing the guest water molecules in a space-filling mode that filled in cavities of **3**.

(a)

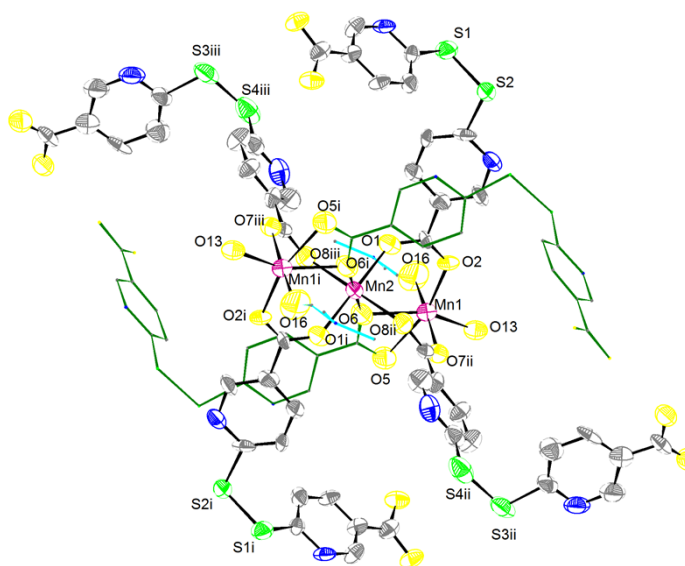

(b)

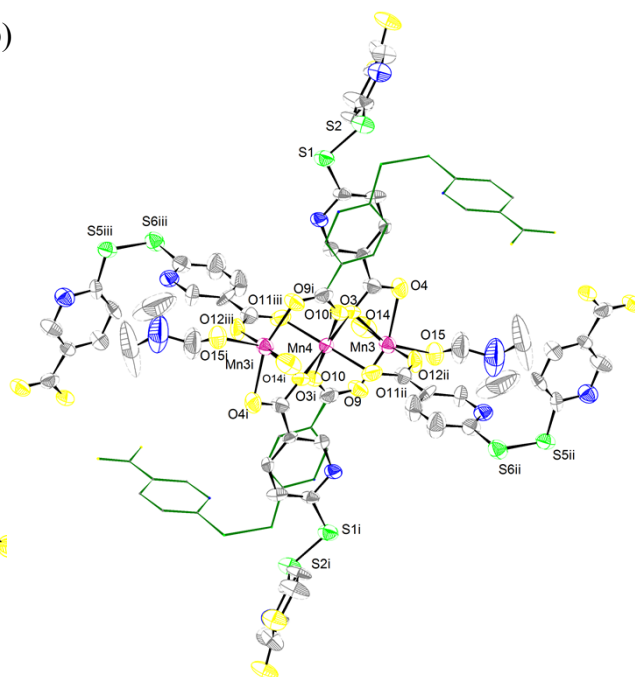

**Fig. S20** Compound **4** has two kinds of trinuclear clusters with similar environments (left and right). Hydrogen atoms were omitted for clarity (symmetry transformations used to generate equivalent atoms: for left, i = -x, 1 -y, -z, ii = -1 + x, y, z, iii = 1 -x, 1 -y, -z; for right, i = -x, -y, 1 -z, ii = -1 + x, y, z, iii = 1 -x, -y, 1 -z).

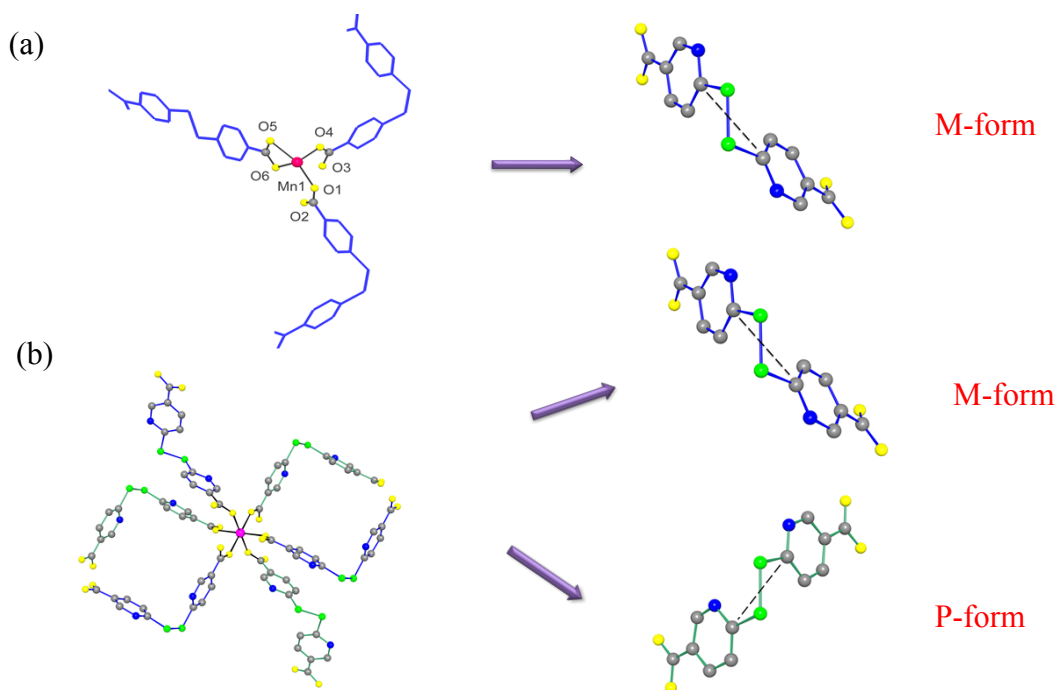

**Fig. S21** Showing the chirality forms of the  $\text{dtdn}^{2-}$  ligands of **4**: (a) that are coordinated to the Mn1 atom exhibiting M-form, (b) that of the Mn2 atom display M- and P-forms.

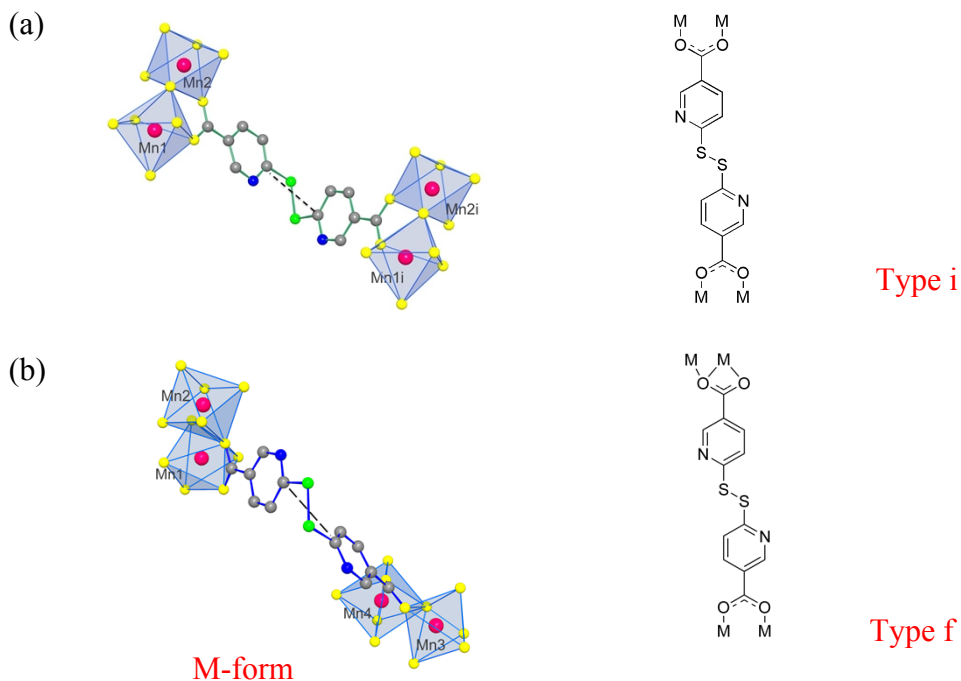

**Fig. S22** The structural views of **4** show the axial chirality forms, coordination modes, and torsion angles ( $-\text{C}-\text{S}-\text{S}-\text{C}-$ ) of the  $\text{dtdn}^{2-}$  ligands: (a) M-form, Type (i),  $104.6^\circ$  and  $104.9^\circ$  (symmetry transformations used to generate equivalent atoms:  $i = 1 + x, y, z$ ); (b) M-form, Type (f),  $103.2^\circ$  and  $105.8^\circ$ .

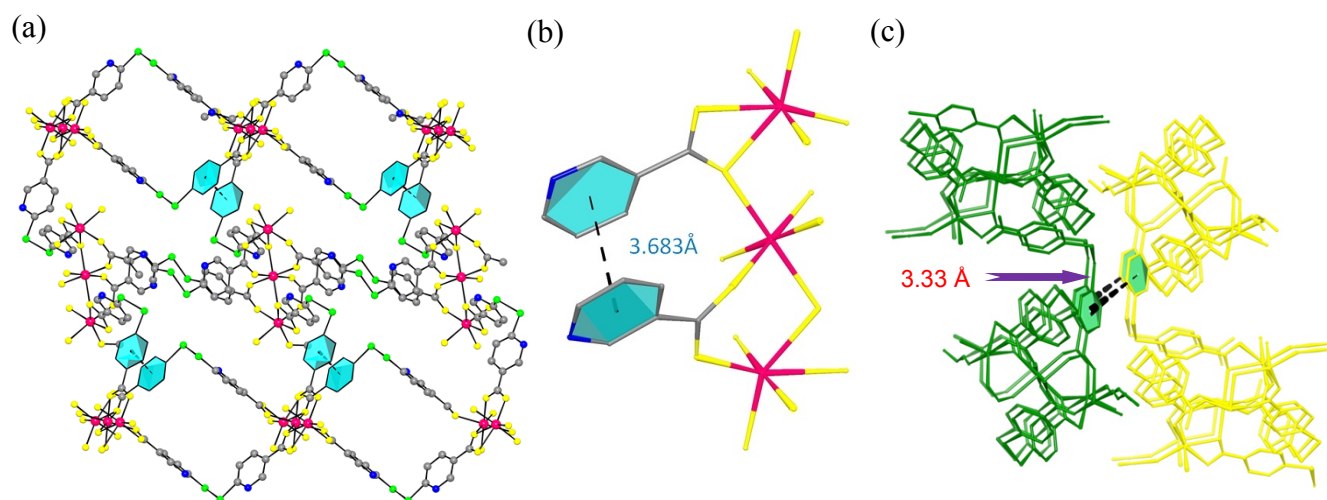

**Fig. S23** (a) The adjacent layers of **4** are regularly stacked into a 2D network. (b) Connecting through the  $\pi$ - $\pi$  stacking interactions via intralayers with 3.68 Å. (c) Connecting via the interlayer with 3.33 Å.

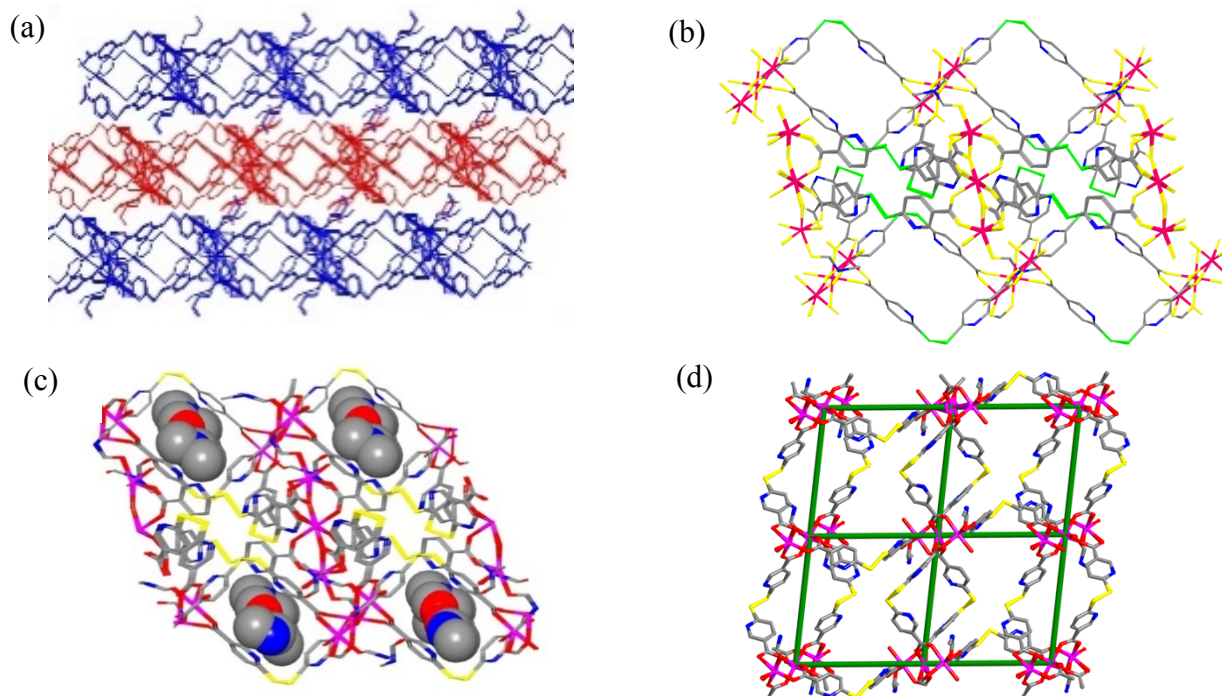

**Fig. S24** (a) The 2D layers are stacked through the  $\pi$ - $\pi$  interactions in an ABAB manner to give a 3D framework of **4** viewed along the *a* axis. (b) The 1D channels are apparent viewed along the *c* axis. (c) The guest water and DMF molecules are included in the channels. (d) The separation distances in a 2D grid network are about 12.9 x 13.5 Å<sup>2</sup>.

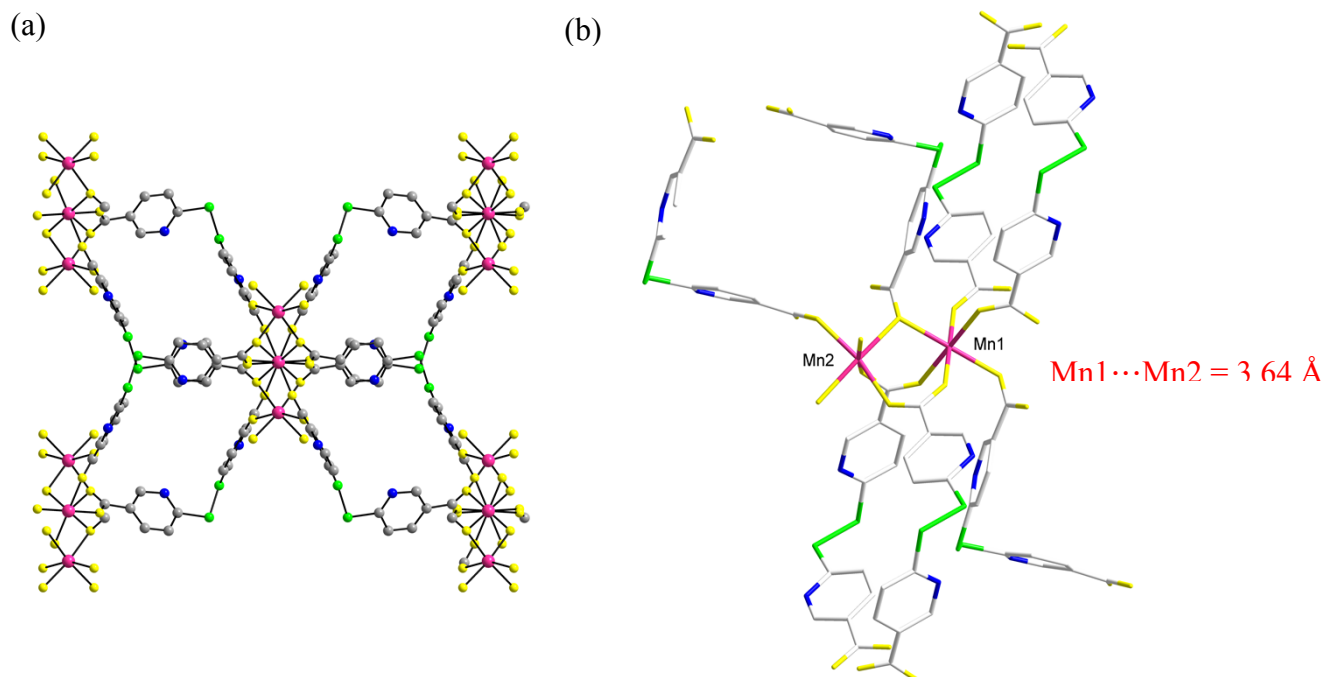

**Fig. S25** (a) Coordination environments of the Mn(II) cations in the trinuclear cluster unit of **5**. Hydrogen atoms were omitted for clarity. (b) Showing an infinite zigzag metal-oxide wire that is connected via the Mn(II) ions and bridged by the carboxylates from the  $\text{dtdn}^{2-}$  ligands in  $\mu_2, \eta^1$ - and  $\mu_2, \eta^2$ -manners viewed along the  $a$  axis.

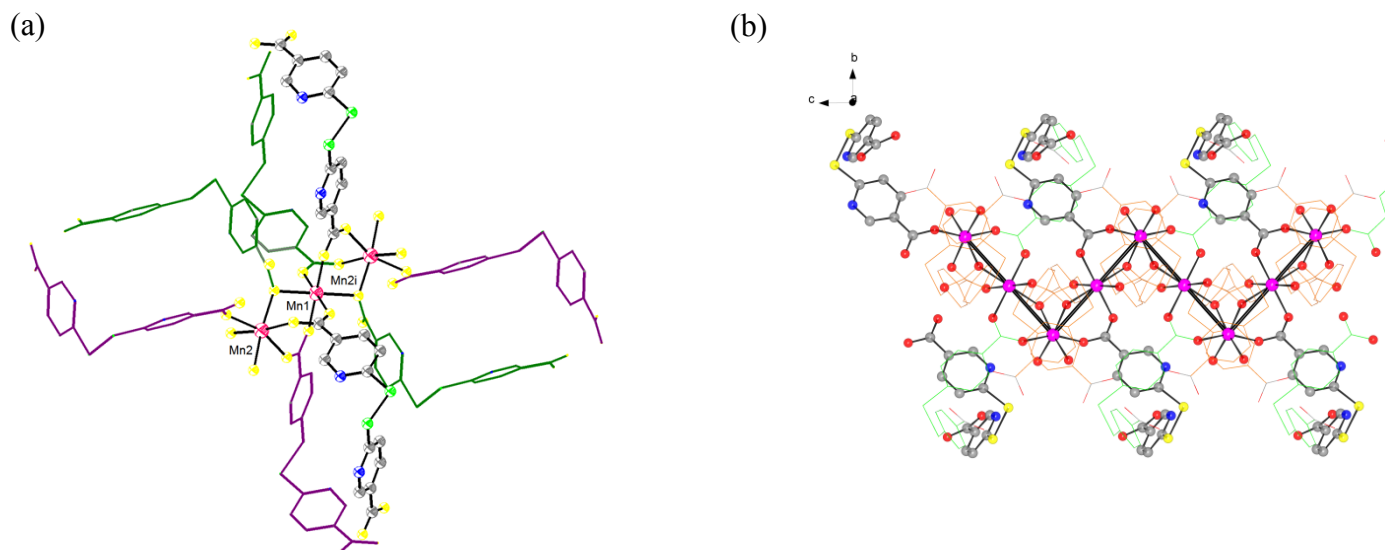

**Fig. S26** (a) View of a 2D framework of **5** that is self-assembled from the manganese-oxide wires and the bridging  $\text{dtdn}^{2-}$  ligands viewed along the  $c$  axis (symmetry transformations used to generate equivalent atoms:  $i = 2 - x, -y, 2 - z$ ). (b) Showing the coordination environments of the  $\text{dtdn}^{2-}$  ligands and the separation distance of  $\text{Mn1} \cdots \text{Mn2}$  with  $3.64(1) \text{ \AA}$  in the metal-oxide wire.



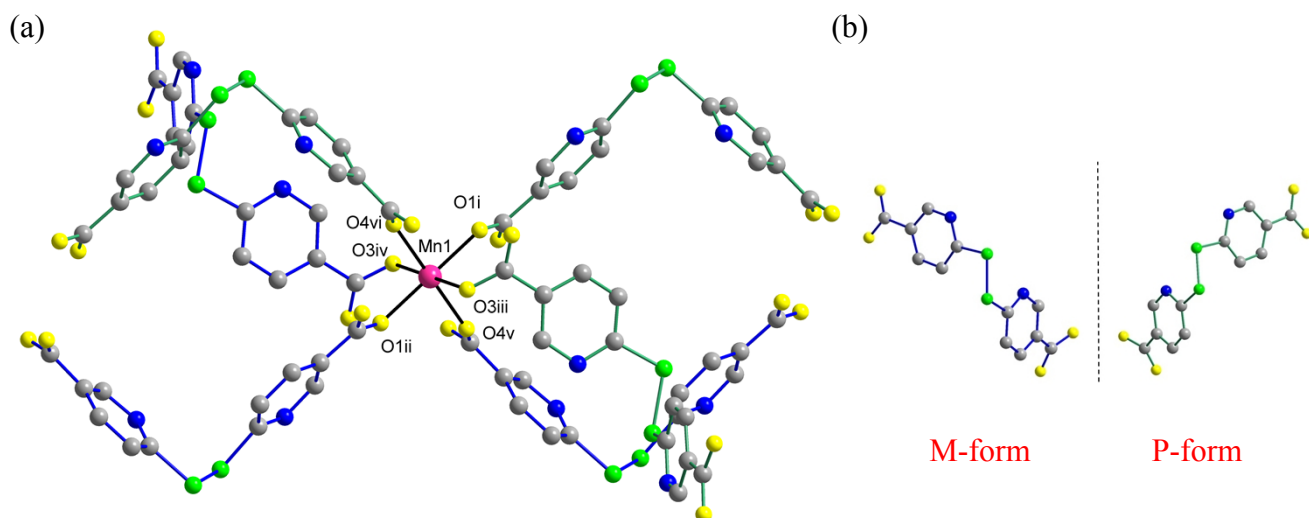

**Fig. S27** Structure of compound **5**: (a) showing the coordination environments of the  $\text{dtdn}^{2-}$  ligand on the Mn1 atom (symmetry transformations used to generate equivalent atoms: i = x, y, z, ii = 2 - x, -y, 2 - z, iii = 1.5 - x, -0.5 + y, 1.5 - z, iv = 0.5 + x, 0.5 - y, 0.5 + z, v = 1.5 - x, 0.5 - y, 2 - z, vi = 0.5 + x, -0.5 + y, z), (b) view of the M- and P-forms.

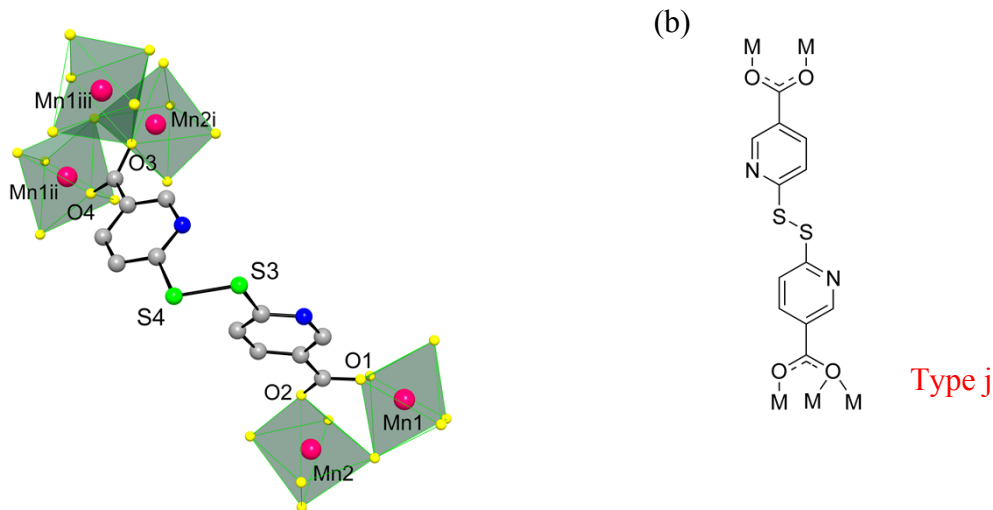

**Fig. S28** (a) The  $\text{dtdn}^{2-}$  ligand is bridged between the Mn(II) cations in compound **5** (highlighted in the polyhedron mode in pale blue color) possesses the torsion angles (C-S-S-C-) of  $104.8^\circ$  and  $104.1^\circ$  (symmetry transformations used to generate equivalent atoms: i = 1.5 - x, 0.5 - y, 2 - z; ii = -0.5 + x, 0.5 + y, z; iii = 1.5 - x, 0.5 + y, 1.5 - z), (b) view of the coordination mode of the  $\text{dtdn}^{2-}$  ligand that exhibits in Type (j).



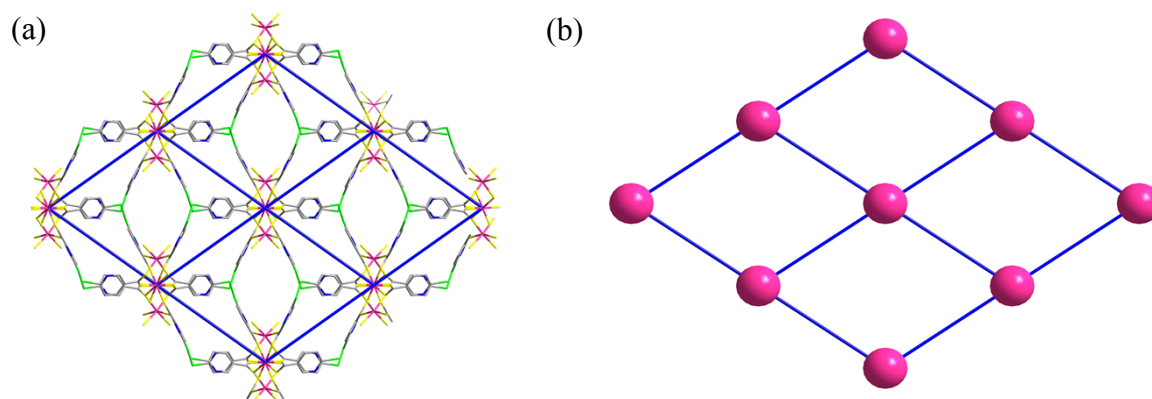

**Fig. S29** The structures of **5**: (a) view of a 2D grid network, (b) the separation distance between each Mn1 center in pink of the metal-oxide wire is 13.9 Å.

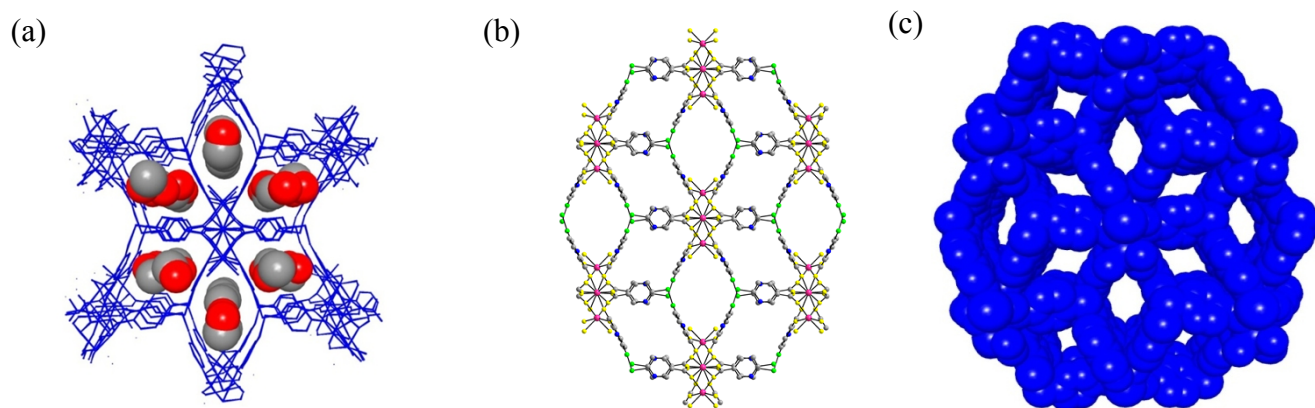

**Fig. S30** Structures of compound **5**: (a) perspective 3D view along the *a* axis with embedded water molecules; (b) a 3D framework showing that the layers are packed in an AAA fashion with the  $\pi$ - $\pi$  interactions between the pyridine motifs of the  $\text{dtdn}^{2-}$  ligands; (c) a 3D packing diagram in a space-filling mode excluded with the van der Waals radii with the window sizes of  $7.7 \times 4.1 \text{ Å}^2$ .

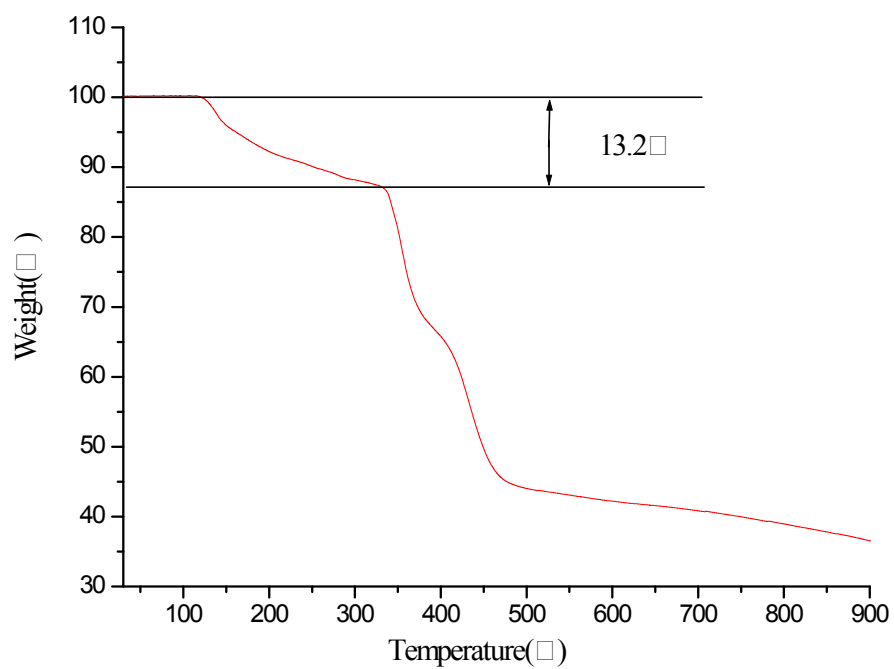

**Fig. S31** Thermogravimetric analysis (TGA) curve of **1**.

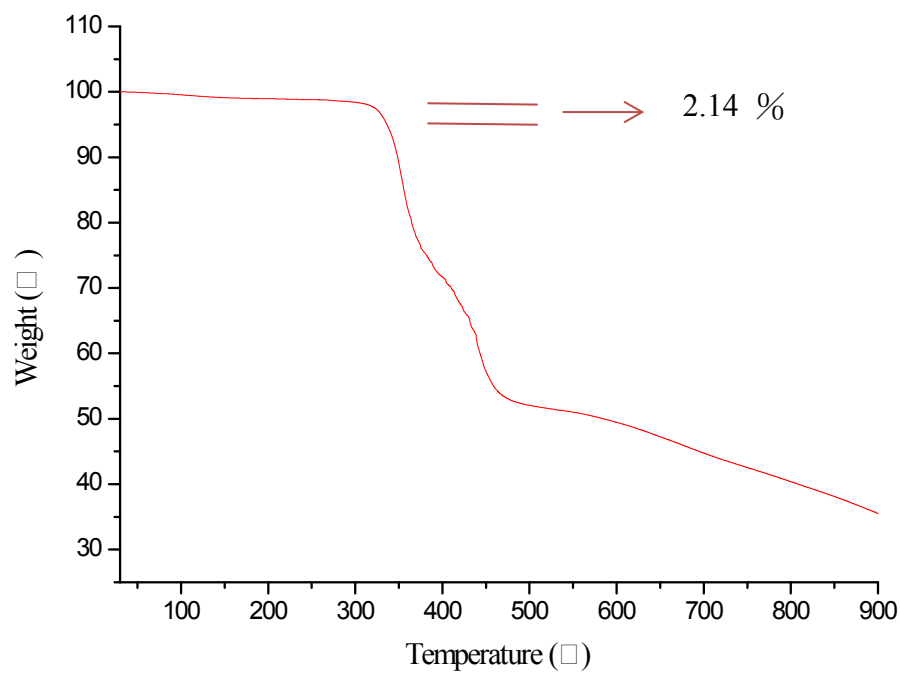

**Fig. S32** Thermogravimetric analysis (TGA) curve of **2**.

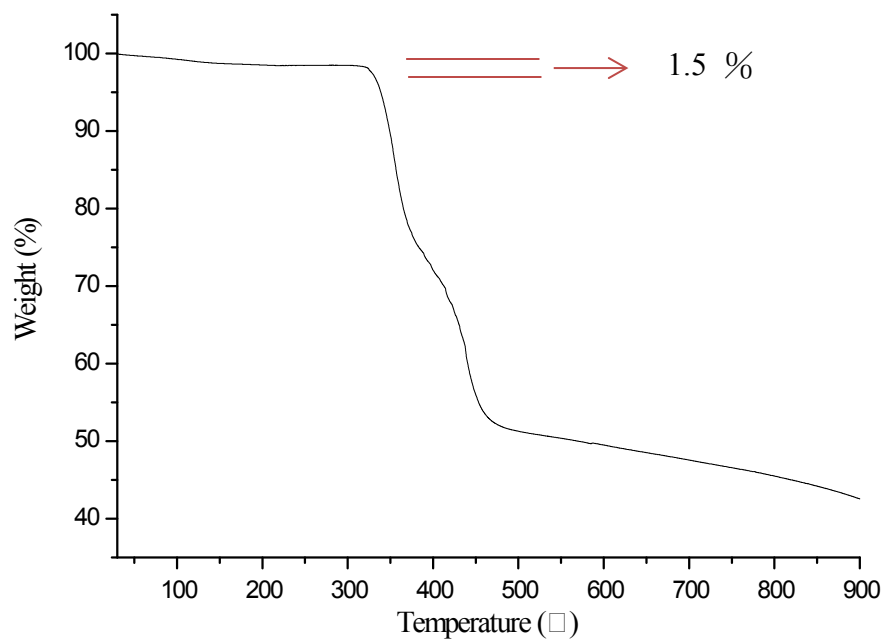

**Fig. S33** Thermogravimetric analysis (TGA) curve of **3**.

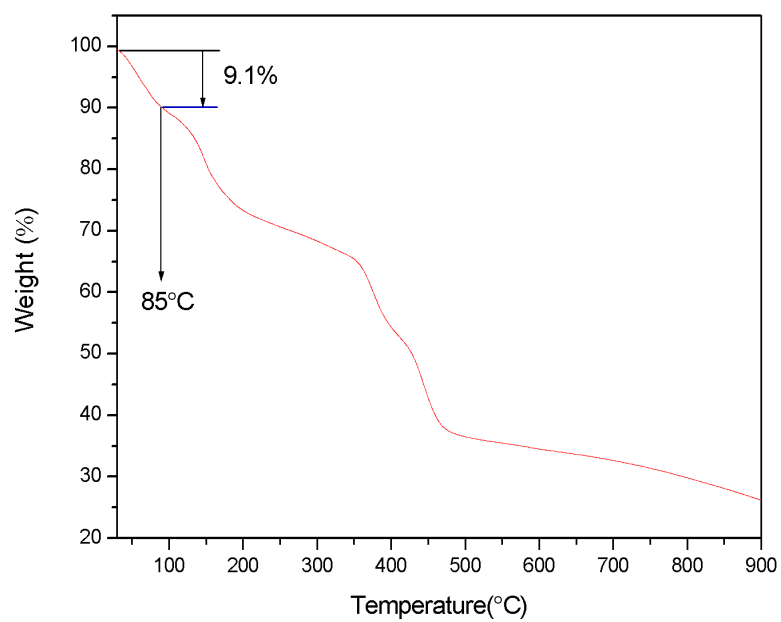

**Fig. S34** Thermogravimetric analysis (TGA) curve of **4**.

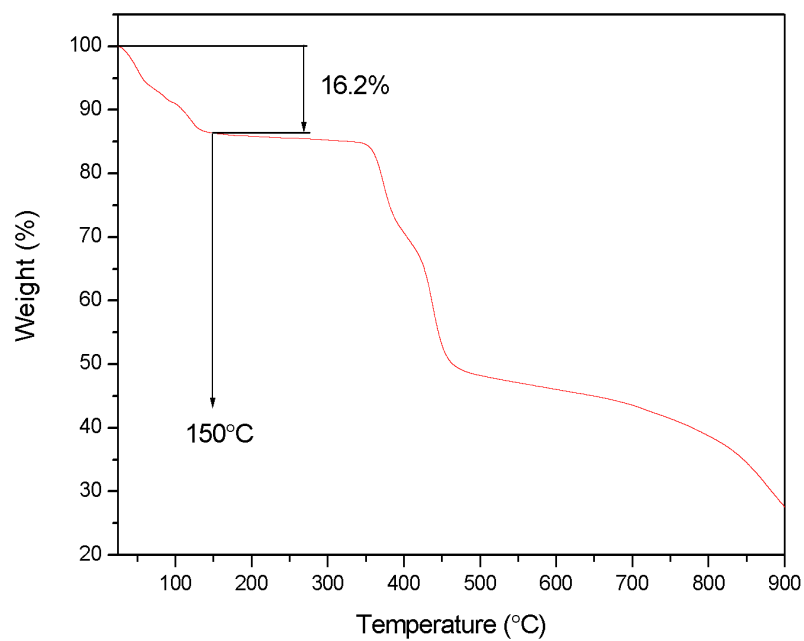

**Fig. S35** Thermogravimetric analysis (TGA) curve of **5**.

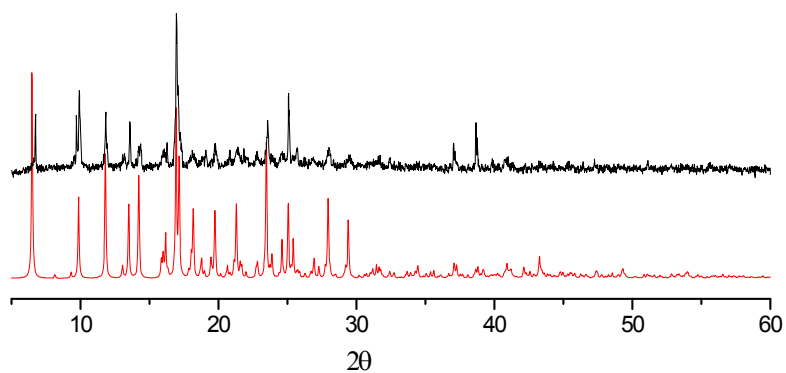

**Fig. S36** Powder X-ray diffraction (PXRD) patterns for **1** (as-synthesized, black; simulated, red).

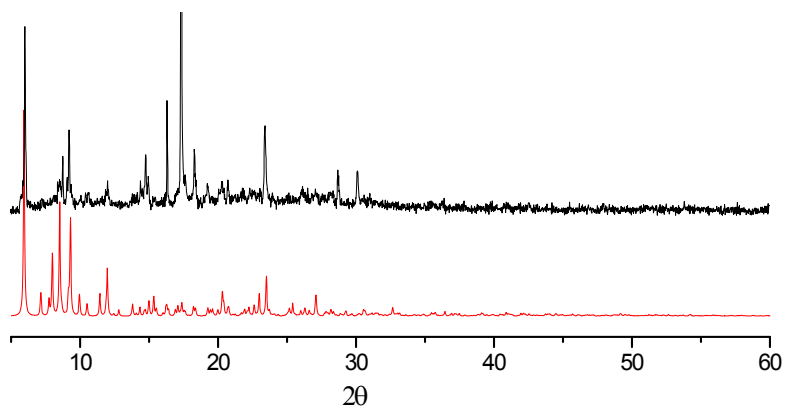

**Fig. S37** Powder X-ray diffraction (PXRD) patterns for **2** (as-synthesized, black; simulated, red).

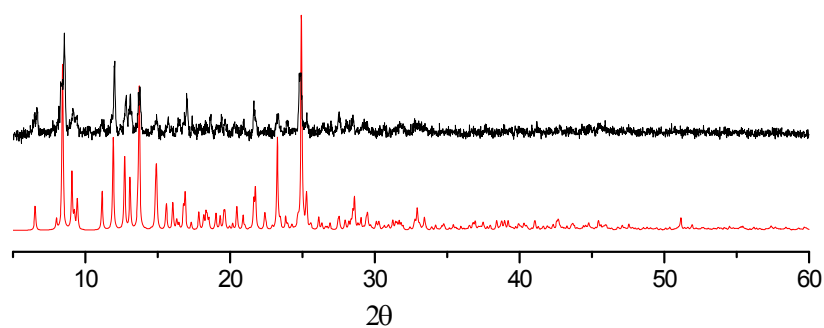

**Fig. S38** Powder X-ray diffraction (PXRD) patterns for **3** (as-synthesized, black; simulated, red).

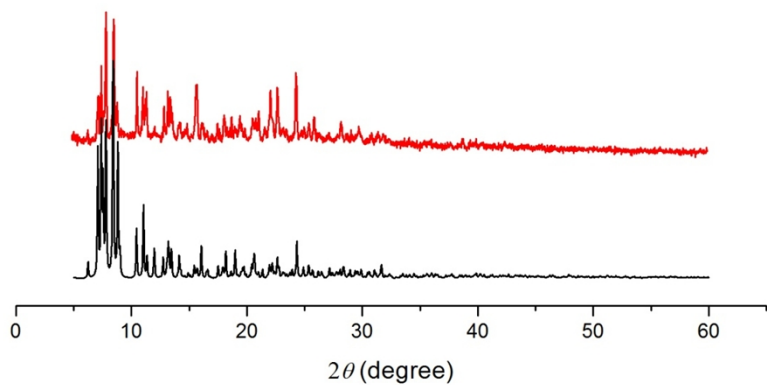

**Fig. S39** Powder X-ray diffraction (PXRD) patterns for **4** (as-synthesized, black; simulated, red).

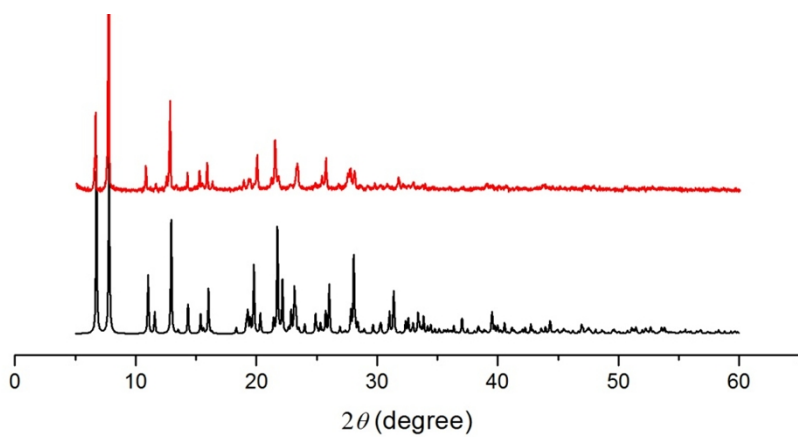

**Fig. S40** Powder X-ray diffraction (PXRD) patterns for **5** (simulated, black; as-synthesized, red).

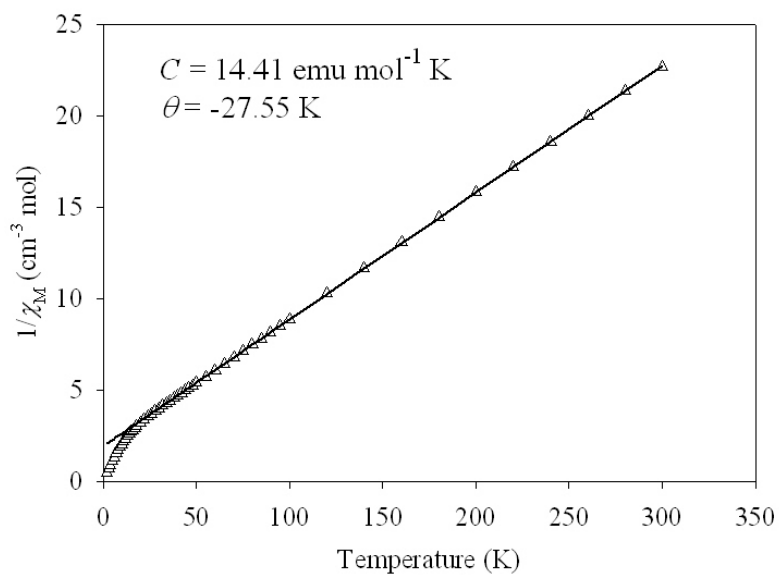

**Fig. S41** Plot of  $1/\chi_M$  vs.  $T$  for a powder compound **2**.



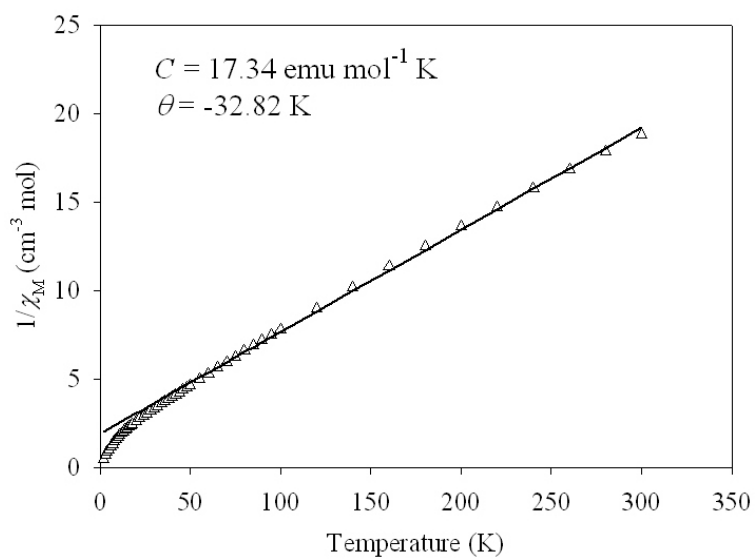

**Fig. S42** Plot of  $1/\chi_M$  vs.  $T$  for a powder compound **3**.

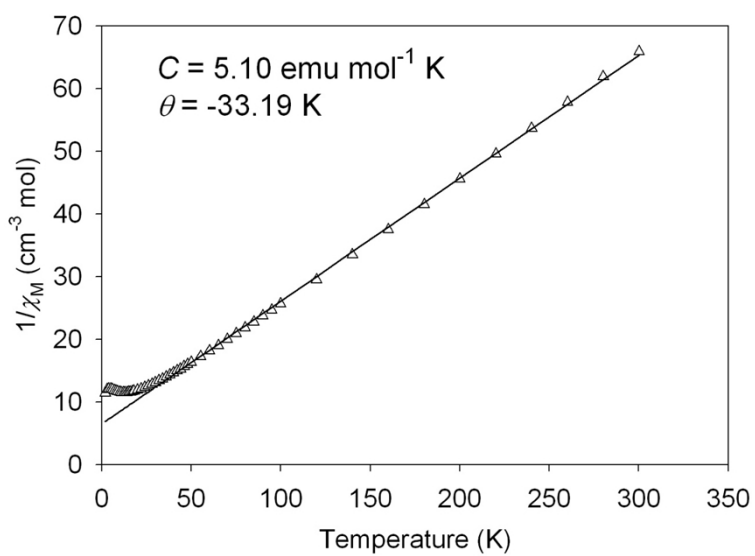

**Fig. S43** Plot of  $1/\chi_M T$  vs.  $T$  for a powder sample of compound **5**.

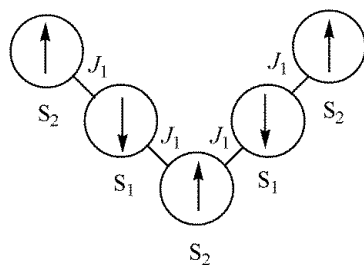

**Fig. S44** Schematic presentation of spin arrangement for **5**.

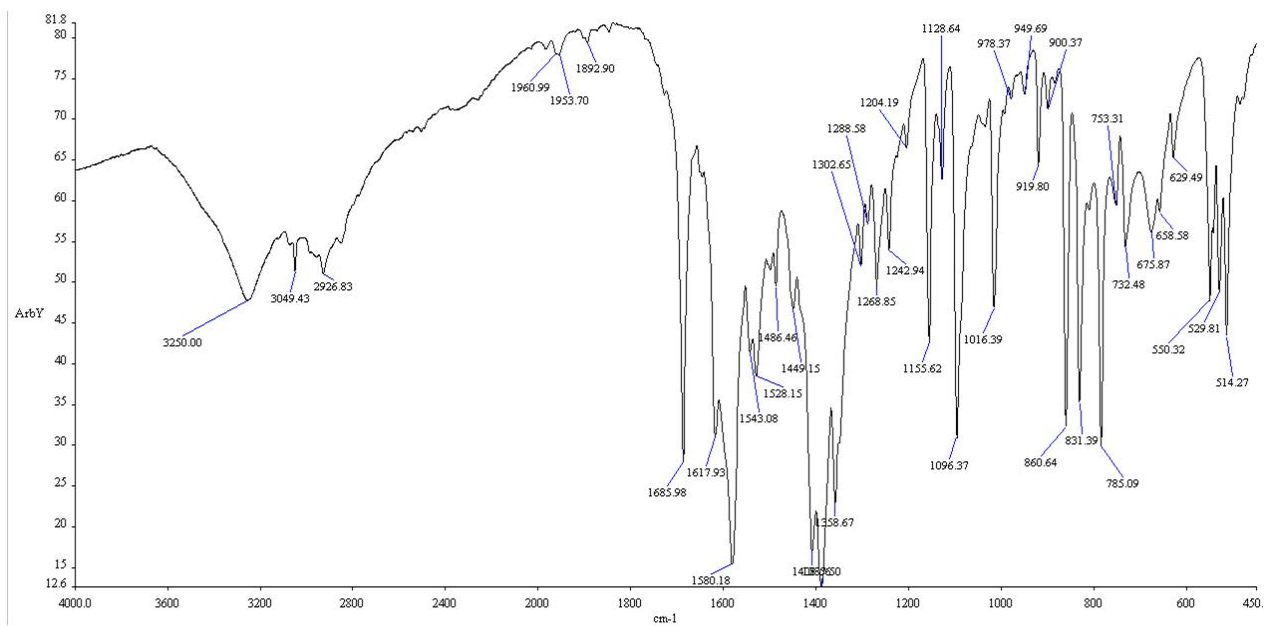

**Fig. S45** IR spectrum of **1**.

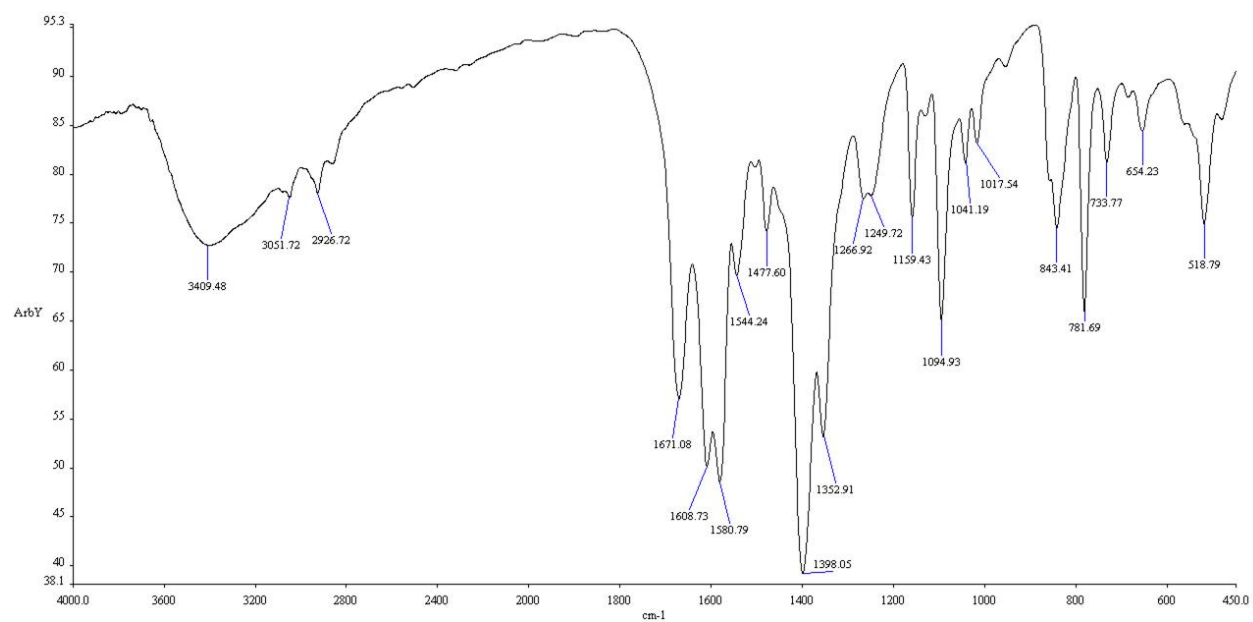

**Fig. S46** IR spectrum of **2**.

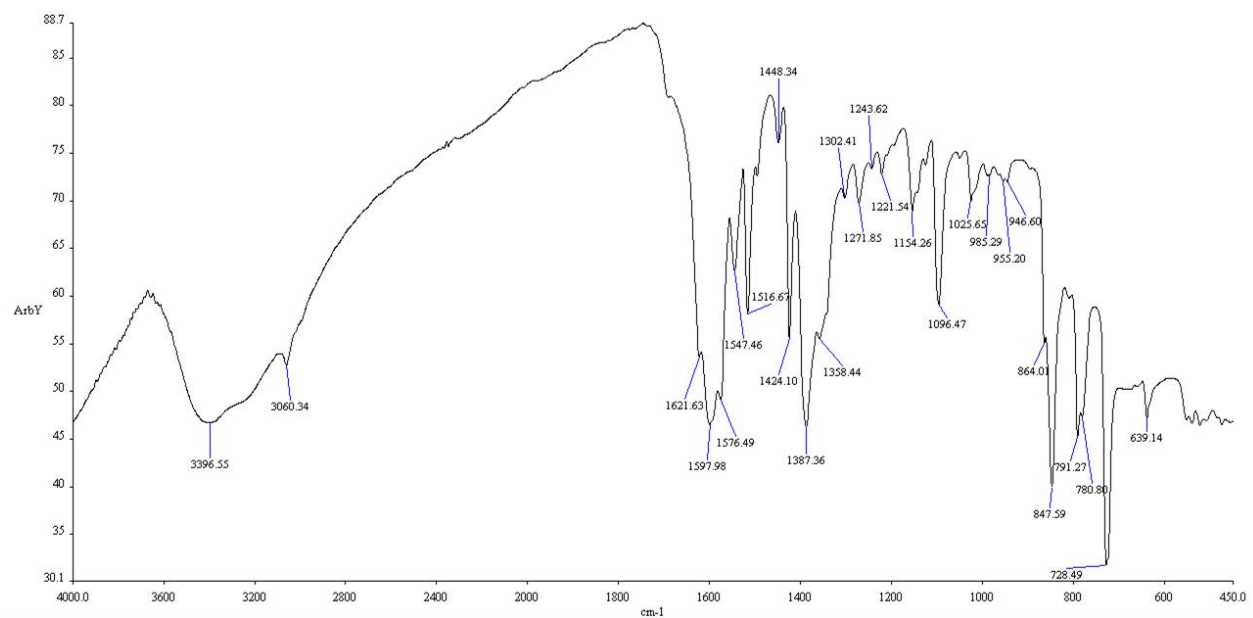

**Fig. S47** IR spectrum of **3**.

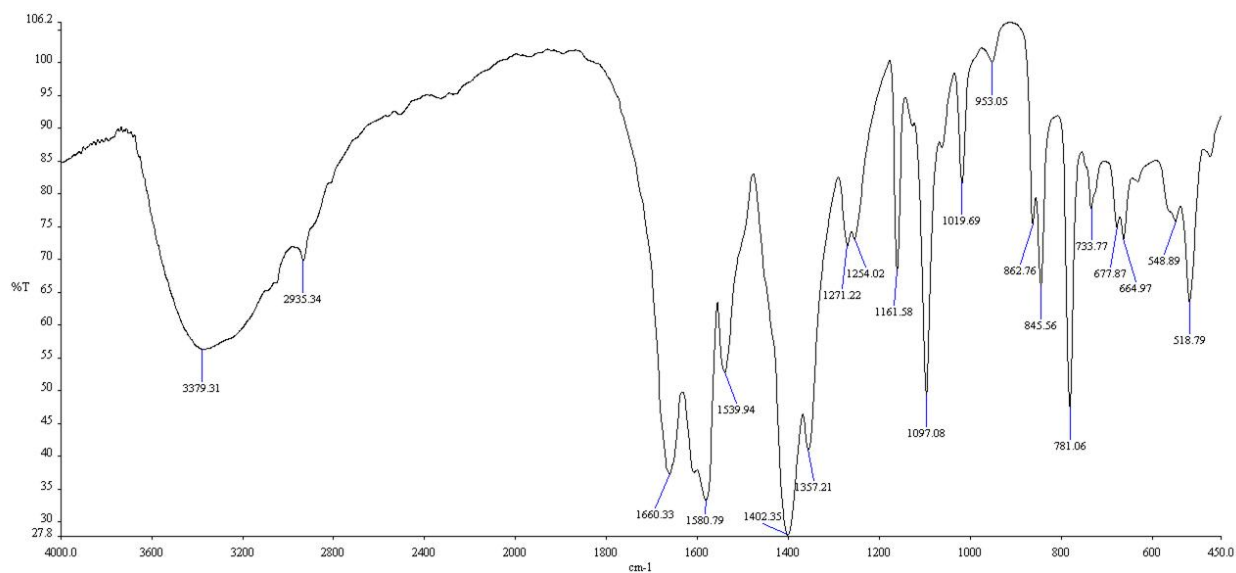

**Fig. S48** IR spectrum of **4**.

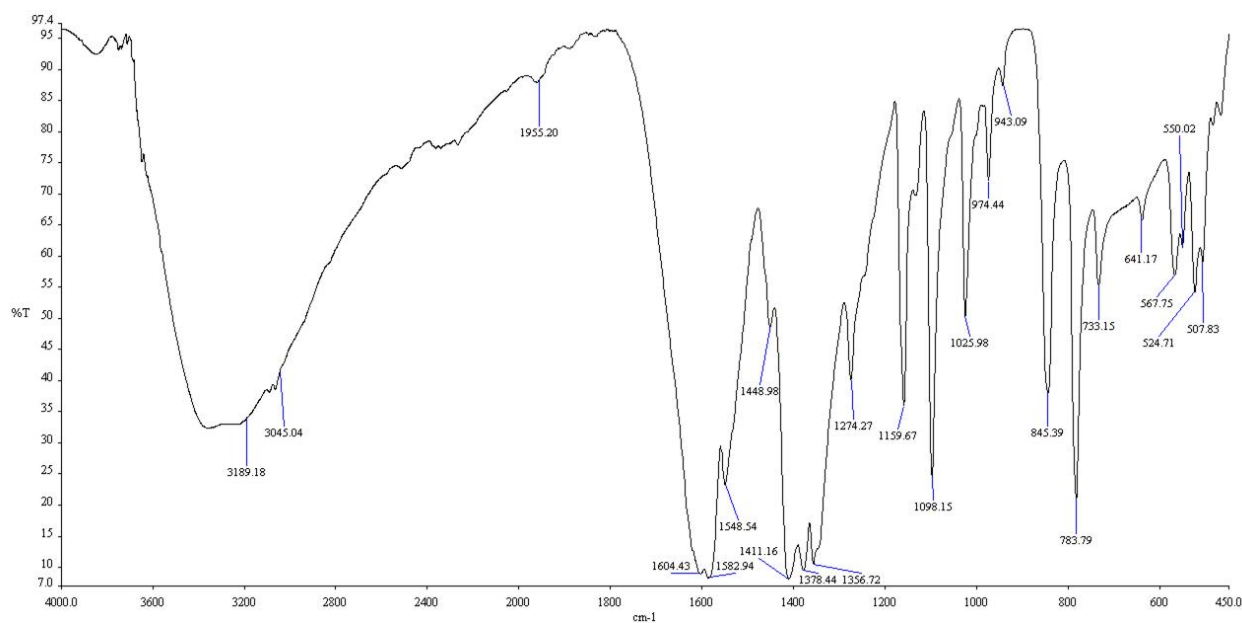

**Fig. S49** IR spectrum of **5**.

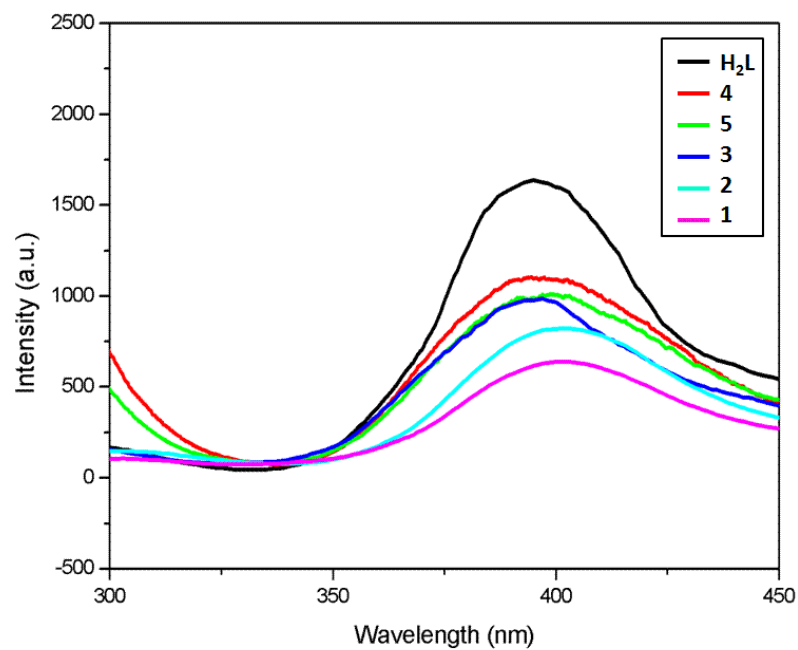

**Fig. S50** Photoluminescence spectra of **1**–**5** and ligand  $H_2L$  (L = dtdn<sup>2-</sup>) in the solid state at room temperature (excited at 240 nm).
